# Supplementary material
Source: MDPI journal article supplement (https://www.mdpi.com/search?q=cancers-11-01340)
Supplement: s001 [file cancers-11-01340-s001.pdf]

# Supplementary Materials: Multigene Panel Testing Increases the Number of Loci Associated with Gastric Cancer Predisposition

Gianluca Tedaldi, Francesca Pirini, Michela Tebaldi, Valentina Zampiga, Ilaria Cangini, Rita Danesi, Valentina Arcangeli, Mila Ravegnani, Raefa Abou Khouzam, Chiara Molinari, Carla Oliveira, Paolo Morgagni, Luca Saragoni, Maria Bencivenga, Paola Ulivi, Dino Amadori, Giovanni Martinelli, Fabio Falcini, Guglielmina Nadia Ranzani and Daniele Calistri

**Table S1.** List of the 31 missense variants classified as probably damaging by both SIFT and PolyPhen2 identified in our case series and patients' characteristics.

| Gene          | Exon | cDNA      | Protein      | dbSNP       | ClinVar                  | SIFT | Polyphen2 HVAR | Patient ID | Sex | Selection criteria | Cancer(s)    | Age at Diagnosis |
|---------------|------|-----------|--------------|-------------|--------------------------|------|----------------|------------|-----|--------------------|--------------|------------------|
| <i>FH</i>     | 2    | c.234C>A  | p.Asn78Lys   | -           | -                        | D    | D              | BM32       | F   | I                  | DGC          | 49               |
| <i>EPCAM</i>  | 6    | c.605A>C  | p.Lys202Thr  | -           | -                        | D    | D              | BM67       | F   | I                  | DGC          | 41               |
| <i>PMS1</i>   | 3    | c.224C>T  | p.Thr75Ile   | rs61756360  | -                        | D    | D              | BM31       | F   | I                  | DGC          | 47               |
| <i>FANCD2</i> | 3    | c.195G>C  | p.Gln65His   | rs36084488  | VUS/Benign               | D    | D              | BM71       | M   | II                 | DGC          | 35               |
| <i>GATA2</i>  | 5    | c.1010G>A | p.Arg337Gln  | -           | -                        | D    | D              | BM67       | F   | I                  | DGC          | 41               |
| <i>KIT</i>    | 21   | c.2867G>A | p.Arg956Gln  | rs139694927 | VUS                      | D    | D              | BM85       | M   | I                  | IGC          | 66               |
| <i>PMS2</i>   | 2    | c.52A>G   | p.Ile18Val   | rs63750123  | VUS/Likely benign/Benign | D    | D              | BM56       | F   | I                  | DGC          | 55               |
| <i>MET</i>    | 14   | c.2975C>T | p.Thr992Ile  | rs56391007  | VUS/Likely benign/Benign | D    | D              | BM93       | M   | I                  | DGC          | 65               |
| <i>MET</i>    | 14   | c.2975C>T | p.Thr992Ile  | rs56391007  | VUS/Likely benign/Benign | D    | D              | BM50       | F   | IV                 | LBC, LBC     | 53, 58           |
| <i>EZH2</i>   | 19   | c.2151G>C | p.Gln717His  | -           | -                        | D    | D              | BM62       | M   | I                  | DGC          | 45               |
| <i>WRN</i>    | 14   | c.1717A>G | p.Thr573Ala  | rs150148567 | VUS/Likely benign        | D    | D              | BM58       | M   | I                  | DGC          | 54               |
| <i>WRN</i>    | 14   | c.1717A>G | p.Thr573Ala  | rs150148567 | VUS/Likely benign        | D    | D              | BM75       | F   | I                  | IGC, OC, LBC | 57, 60, 72       |
| <i>WRN</i>    | 17   | c.1909C>T | p.Arg637Trp  | rs148286708 | VUS                      | D    | D              | BM58       | M   | I                  | DGC          | 54               |
| <i>WRN</i>    | 30   | c.3523C>A | p.Pro1175Thr | -           | -                        | D    | D              | BM84       | F   | I                  | LBC, DGC     | 61, 66           |
| <i>NBN</i>    | 3    | c.283G>A  | p.Asp95Asn   | rs61753720  | VUS/Likely benign/Benign | D    | D              | BM41       | F   | III                | LBC          | 45               |
| <i>NBN</i>    | 3    | c.283G>A  | p.Asp95Asn   | rs61753720  | VUS/Likely benign/Benign | D    | D              | BM96       | F   | II                 | DGC          | 33               |
| <i>RET</i>    | 11   | c.1946C>T | p.Ser649Leu  | rs148935214 | VUS/Likely benign/Benign | D    | D              | BM69       | F   | I                  | GC           | 77               |

|                |    |           |              |             |                          |   |   |       |   |     |              |            |
|----------------|----|-----------|--------------|-------------|--------------------------|---|---|-------|---|-----|--------------|------------|
| <i>RET</i>     | 11 | c.1997A>T | p.Lys666Met  | rs377767439 | VUS                      | D | D | BM48  | F | I   | GC           | 47         |
| <i>BMPRI1A</i> | 11 | c.1243G>A | p.Glu415Lys  | rs140592056 | VUS/Likely benign/Benign | D | D | BM79  | F | III | LBC          | 52         |
| <i>EXT2</i>    | 5  | c.889C>T  | p.Arg297Cys  | rs146098187 | -                        | D | D | BM93  | M | I   | DGC          | 65         |
| <i>CEP57</i>   | 3  | c.333G>C  | p.Gln111His  | rs117321017 | Benign                   | D | D | BM75  | F | I   | IGC, OC, LBC | 57, 60, 72 |
| <i>BRCA2</i>   | 14 | c.7225C>T | p.Pro2409Ser | -           | -                        | D | D | BM72  | M | II  | DGC          | 25         |
| <i>ERCC5</i>   | 14 | c.2890C>T | p.Arg964Trp  | rs574826021 | VUS                      | D | D | BM61  | F | I   | DGC          | 49         |
| <i>FANCM</i>   | 20 | c.4931G>A | p.Arg1644Gln | rs138151018 | Likely benign/Benign     | D | D | BM61  | F | I   | DGC          | 49         |
| <i>FANCI</i>   | 18 | c.1813C>T | p.Leu605Phe  | rs117125761 | Likely benign/Benign     | D | D | BM122 | M | I   | GC           | 59         |
| <i>BLM</i>     | 12 | c.2474C>T | p.Pro825Leu  | rs749632465 | VUS                      | D | D | BM118 | F | I   | DGC          | 54         |
| <i>TSC2</i>    | 17 | c.1747G>A | p.Ala583Thr  | rs1800729   | Benign/Likely benign     | D | D | BM21  | F | I   | DGC          | 47         |
| <i>TSC2</i>    | 17 | c.1747G>A | p.Ala583Thr  | rs1800729   | Benign/Likely benign     | D | D | BM63  | F | I   | DGC, DBC     | 41, 50     |
| <i>SLX4</i>    | 6  | c.1192C>T | p.Arg398Trp  | rs138799572 | VUS                      | D | D | BM114 | F | IV  | LBC, GC, LBC | 36, 38, 52 |
| <i>ERCC4</i>   | 7  | c.1135C>T | p.Pro379Ser  | rs1799802   | VUS/Likely benign        | D | D | BM121 | F | I   | DGC          | 40         |
| <i>ERCC4</i>   | 11 | c.2117T>C | p.Ile706Thr  | rs1800069   | VUS                      | D | D | BM117 | F | II  | DGC          | 36         |
| <i>FLCN</i>    | 6  | c.503G>A  | p.Arg168His  | -           | -                        | D | D | BM118 | F | I   | DGC          | 54         |
| <i>NF1</i>     | 34 | c.4526G>A | p.Arg1509His | rs546073780 | VUS                      | D | D | BM124 | M | I   | DGC          | 51         |
| <i>RAD51D</i>  | 10 | c.932T>A  | p.Ile311Asn  | rs145309168 | VUS/Likely benign        | D | D | BM122 | M | I   | GC           | 59         |
| <i>RHBDF2</i>  | 5  | c.478C>T  | p.Arg160Cys  | rs751482282 | VUS                      | D | D | BM120 | F | II  | DGC          | 36         |

VUS: variant of uncertain significance; D: damaging; GC: gastric cancer; DGC: diffuse-type gastric cancer; IGC: intestinal-type gastric cancer; LBC: lobular breast cancer; DBC: ductal breast cancer; OC: ovarian cancer. Selection criteria I–IV correspond to those established by the IGCLC for HDGC (see Materials and Methods).

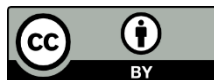

© 2019 by the authors. Licensee MDPI, Basel, Switzerland. This article is an open access article distributed under the terms and conditions of the Creative Commons Attribution (CC BY) license (<http://creativecommons.org/licenses/by/4.0/>).
